# Supplementary material for: Assessing the effect of heavy metals on maize (Zea mays L.) growth and soil characteristics: plants-implications for phytoremediation
Source: PeerJ. 2023 Oct 9;11:e16067. doi: 10.7717/peerj.16067 (PMC11843480; doi:10.7717/peerj.16067)
Supplement: Supplemental Information 1 [file peerj-11-16067-s001.xlsx]

## Sheet: Morhology
	Triticum
	Replication	Treatment	RL	SL	RDW	SDW	NL	LA	Treatment	RL
	R1	T1	14	20	0.49	1	5	13	T1	14
	R1	T2	15	25	0.48	1.2	5	13	T2	15
	R1	T3	14	23	0.44	1.2	4	12	T3	14
	R1	T4	10	20	0.43	1.1	4	11	T4	10
	R1	T5	13	22	0.47	1.2	5	13	T5	13
	R1	T6	12	21	0.43	0.9	3	12	T6	12
	R1	T7	10	18	0.37	0.8	4	10	T7	10
	R1	T8	8	14	0.28	0.8	3	9	T8	8
	R2	T1	14.6	20.8	0.52	0.9	7	13.3
	R2	T2	15.1	25.5	0.5	1.5	8	13.9
	R2	T3	14.2	23.4	0.45	1.4	5	12.8	Treatment	SL
	R2	T4	10.4	19.9	0.45	1.5	5	11.2	T1	20		0.34641	0.257735	0.21547	0.63094	0.157735	0.273205	0.54641	0.34641
	R2	T5	13.1	22.7	0.5	1.6	8	13.7	T2	25		0.46188	0.817321	0.457735	0.519615	0.71547	0.404145	0.311547	0.857735
	R2	T6	12.3	21.7	0.47	1.2	3.5	12.3	T3	23
	R2	T7	10.6	18.3	0.47	1.1	6	11	T4	20
	R2	T8	8.5	14.1	0.2	0.83	3.3	9.5	T5	22
	R3	T1	13.4	19.2	0.46	1.1	3	12.7	T6	21
	R3	T2	14.9	24.5	0.46	0.9	2	12.1	T7	18
	R3	T3	13.8	22.6	0.43	1	3	11.2	T8	14
	R3	T4	9.6	20.1	0.41	0.7	3	10.8
	R3	T5	12.9	21.3	0.44	0.8	2	12.3
	R3	T6	11.7	20.3	0.38	0.6	2.5	11.7
	R3	T7	9.4	17.7	0.27	0.5	2	9
	R3	T8	7.5	13.9	0.36	0.77	2.7	8.5
	T1	14	20	1.7	1	5	13
	T1	14.6	20.8	1.9	0.9	7	13.3
	T1	13.4	19.2	1.5	1.1	3	12.7
	average	14	20	1.7	1	5	13
	T2	15	25	1.7	1.2	5	13
	T2	15.1	25.5	2.1	1.5	8	13.9
	T2	14.9	24.5	1.3	0.9	2	12.1
	average	15	25	1.7	1.2	5	13
	T3	14	23	1.4	1.2	4	12
	T3	14.2	23.4	1.9	1.4	5	12.8
	T3	13.8	22.6	0.9	1	3	11.2
	average	14	23	1.4	1.2	4	12		Treatment	RDW
									T1	0.49
									T2	0.48
									T3	0.44
	T4	10	20	1.6	1.1	4	11		T4	0.43
	T4	10.4	19.9	1.7	1.5	5	11.2		T5	0.47
	T4	9.6	20.1	1.5	0.7	3	10.8		T6	0.43
	average	10	20	1.6	1.1	4	11		T7	0.37		0.0373205	0.041547	0.031547	0.0352767	0.0273205	0.0360342	0.047735	0.0057735
									T8	0.28		0.0309401	0.0886751	0.057735	0.0486751	0.0154701	0.020547	0.0404145	0.057735
									Treatment	SDW
	T5	13	22	1.5	1.2	5	13		T1	1
	T5	13.1	22.7	1.9	1.5	8	13.7		T2	1.2
	T5	12.9	21.3	1.1	0.9	2	12.3		T3	1.2
	average	13	22	1.5	1.2	5	13		T4	1.1
									T5	1.2
									T6	0.9
									T7	0.8
									T8	0.8
	T6	12	21	1.4	0.9	3	12
	T6	12.3	21.7	1.7	1.2	3.5	12.3
	T6	11.7	20.3	1.1	0.6	2.5	11.7		Treatment	NL
	average	12	21	1.4	0.9	3	12		T1	5
									T2	5
									T3	4
									T4	4
									T5	5
	T7	10	18	1.4	0.8	4	10		T6	3
	T7	10.6	18.3	1.6	1.1	6	11		T7	4
	T7	9.4	17.7	1.2	0.5	2	9		T8	3		0.25	0.132051	0.20735	0.0773503	0.25	0.16	0.27735	0.31
	average	10	18	1.4	0.8	4	10					0.61547	0.519615	0.74641	0.700538	0.404145	0.732051	0.423094	0.732051
									Treatment	LA
									T1	13
	T8	8	14	1	0.8	3	9		T2	13
	T8	8.5	14.1	0.8	0.83	3.3	9.5		T3	12
	T8	7.5	13.9	1.2	0.77	2.7	8.5		T4	11
	average	8	14	1	0.8	3	9		T5	13
									T6	12
									T7	10
									T8	9

## Sheet: Physiology
	Triticum
	Replicat	Treatment	a	b	CAT	Proline	TFA	K		Treatment	a
	R1	T1	1.5	1.1	18	0.1	4	14		T1	1.5
	R1	T2	1.55	1.1	26	0.13	5	21		T2	1.55
	R1	T3	1.25	0.93	27	0.16	5	28		T3	1.25
	R1	T4	1.21	0.88	24	0.2	7	28		T4	1.21
	R1	T5	1.45	1.2	22	0.18	6	25		T5	1.45
	R1	T6	1.2	0.95	20	0.22	7.6	34		T6	1.2
	R1	T7	1.1	0.85	23	0.26	8.2	30		T7	1.1
	R1	T8	1.1	0.82	25	0.29	7.2	35		T8	1.1
	R2	T1	1.7	1.2	19	0.13	4.5	14.3
	R2	T2	1.4	1.14	26.4	0.23	5.2	21.5
	R2	T3	1	1.03	27.2	0.12	4.7	27.6		Treatment	b
	R2	T4	1.2	0.9	24.5	0.25	7.6	28.3		T1	1.1		Chl.a	0.11547	0.136603	0.0843376	0.0757735	0.097735	0.0832051	0.043094	0.0288675
	R2	T5	1.35	1.15	22.4	0.21	6.5	25.5		T2	1.1		Chl.b	0.057735	0.023094	0.037735	0.041547	0.0488675	0.0488675	0.0604145	0.031547
	R2	T6	1.5	0.9	20.7	0.27	7.8	34.4		T3	0.93
	R2	T7	1.14	0.92	23.8	0.36	8.5	30.1		T4	0.88
	R2	T8	1.15	0.8	25.5	0.16	7.8	35.2		T5	1.2
	R3	T1	1.3	1	17	0.07	3.5	13.7		T6	0.95
	R3	T2	1.7	1.06	25.6	0.03	4.8	20.5		T7	0.85
	R3	T3	1.37	0.83	26.8	0.16	5.3	28.4		T8	0.82
	R3	T4	1.19	0.86	23.5	0.15	6.4	27.7
	R3	T5	1.55	1.25	21.6	0.15	5.5	24.5
	R3	T6	0.9	1	19.3	0.17	7.4	33.6
	R3	T7	1.06	0.78	22.2	0.16	7.9	29.9
	R3	T8	1.05	0.84	24.5	0.42	6.6	34.8
		Treatment	Chl.a	Chl.b	CAT	Proline	TFA	K
		T0	1.5	1.1	18	0.1	4	14
		T0	1.7	1.2	19	0.13	4.5	14.3
		T0	1.3	1	17	0.07	3.5	13.7
		average	1.5	1.1	18	0.1	4	14
		Treatment	Chl.a	Chl.b	CAT	Proline	TFA	K		Treatment	CAT
		TR1	1.55	1.1	26	0.13	5	21		T1	18
		TR1	1.4	1.14	26.4	0.23	5.2	21.5		T2	26	CAT	0.57735	0.91547	0.288675	0.73094	0.573205	0.46188	0.73094	0.888675
		TR1	1.7	1.06	25.6	0.03	4.8	20.5		T3	27
		average	1.55	1.1	26	0.13	5	21		T4	24
										T5	22
										T6	20
										T7	23
		Treatment	Chl.a	Chl.b	CAT	Proline	TFA	K		T8	25
		TR2	1.25	0.93	27	0.16	5	28
		TR2	1.5	0.83	27.2	0.2	5.3	28.4
		TR2	1	1.03	26.8	0.12	4.7	27.6
		average	1.25	0.93	27	0.16	5	28
		Treatment	Chl.a	Chl.b	CAT	Proline	TFA	K
		TR3	1.21	0.88	24	0.2	7	28
		TR3	1.2	0.9	24.5	0.25	7.6	28.3
		TR3	1.19	0.86	23.5	0.15	6.4	27.7
		average	1.2	0.88	24	0.2	7	28
										Treatment	Proline
										T1	0.1
		Treatment	Chl.a	Chl.b	CAT	Proline	TFA	K		T2	0.13	Proline	0.0173205	0.0150735	0.023094	0.0148675	0.0373205	0.0288675	0.017735	0.0450555
		TS1	1.45	1.2	22	0.18	6	25		T3	0.16
		TS1	1.35	1.15	22.4	0.21	6.5	25.5		T4	0.2
		TS1	1.55	1.25	21.6	0.15	5.5	24.5		T5	0.18
		average	1.45	1.2	22	0.18	6	25		T6	0.22
										T7	0.26
										T8	0.29
		Treatment	Chl.a	Chl.b	CAT	Proline	TFA	K
		TS2	1.2	0.95	20	0.22	7.6	34
		TS2	1.5	0.9	20.7	0.27	7.8	34.4
		TS2	0.9	1	19.3	0.17	7.4	33.6
		average	1.2	0.95	20	0.22	7.6	34
		Treatment	Chl.a	Chl.b	CAT	Proline	TFA	K
		TS3	1.1	0.85	23	0.26	8.2	30
		TS3	1.14	0.92	23.8	0.36	8.5	30.1
		TS3	1.06	0.78	22.2	0.16	7.9	29.9
		average	1.1	0.85	23	0.26	8.2	30
										Treatment	TFA
										T1	4
										T2	5
		Treatment	Chl.a	Chl.b	CAT	Proline	TFA	K		T3	5	TFA	0.288675	0.11547	0.173205	0.34641	0.288675	0.41547	0.273205	0.24641
		T4	1.1	0.82	25	0.29	7.2	35		T4	7
		T4	1.15	0.8	25.5	0.16	7.8	35.2		T5	6
		T4	1.05	0.84	24.5	0.42	6.6	34.8		T6	7.6
		average	1.1	0.82	25	0.29	7.2	35		T7	8.2
										T8	7.2
										Treatment	K
										T1	14
										T2	21
										T3	28
										T4	28	K	0.7	1.4	0.8	1	1.28868	1.23094	0.957735	1.11547
										T5	25
										T6	34
										T7	30
										T8	35

## Sheet: Corelation data
	RL	SL	RDW	SDW	NL	LA	a	b	CAT	Proline	TFA	K
	14	20	0.49	1	5	13	1.5	1.1	18	0.1	4	14
	15	25	0.48	1.2	5	13	1.55	1.1	26	0.13	5	21
	14	23	0.44	1.2	4	12	1.25	0.93	27	0.16	5	28
	10	20	0.43	1.1	4	11	1.21	0.88	24	0.2	7	28
	13	22	0.47	1.2	5	13	1.45	1.2	22	0.18	6	25
	12	21	0.43	0.9	3	12	1.2	0.95	20	0.22	7.6	34
	10	18	0.37	0.8	4	10	1.1	0.85	23	0.26	8.2	30
	8	14	0.28	0.8	3	9	1.1	0.82	25	0.29	7.2	35
	ET	CT	PT	MXCA	VBA	PiA	a	b	CAT	Proline	TFA	K
	0.3	1	1	0.9	8	12	1.5	1.1	18	0.1	4	14
	0.2	1.2	0.7	0.9	8	13	1.55	1.1	26	0.13	5	21
	0.3	1.5	0.8	0.5	7	13	1.25	0.93	27	0.16	5	28
	0.32	1.6	1.2	0.4	7	15	1.21	0.88	24	0.2	7	28
	0.31	1	0.8	0.8	9	10	1.45	1.2	22	0.18	6	25
	0.34	1.3	0.8	0.3	9	9	1.2	0.95	20	0.22	7.6	34
	0.36	1.9	0.9	0.3	11	7	1.1	0.85	23	0.26	8.2	30
	0.37	2	1.1	0.2	12	5	1.1	0.82	25	0.29	7.2	35
	UET	LT	MXCA	AdSD	AbSD	a	b	CAT	Proline	TFA	K
	0.4	6	0.4	75	90	1.5	1.1	18	0.1	4	14
	0.37	5.7	0.37	50	90	1.55	1.1	26	0.13	5	21
	0.44	6.5	0.35	58	80	1.25	0.93	27	0.16	5	28
	0.51	6.5	0.35	65	60	1.21	0.88	24	0.2	7	28
	0.42	5.8	0.2	48	95	1.45	1.2	22	0.18	6	25
	0.47	5.5	0.26	55	100	1.2	0.95	20	0.22	7.6	34
	0.54	5.5	0.34	63	105	1.1	0.85	23	0.26	8.2	30
	0.55	5.6	0.34	70	75	1.1	0.82	25	0.29	7.2	35

## Sheet: Stem Anatomy
	Triticum		Stem
	Replicate	Treatment	ET	CT	PT	MXCA	VBA	PiA
	R1	T1	0.3	1	1	0.9	8	12
	R1	T2	0.2	1.2	0.7	0.9	8	13		Treatment	ET
	R1	T3	0.3	1.5	0.8	0.5	7	13		T1	0.3
	R1	T4	0.32	1.6	1.2	0.4	7	15		T2	0.2
	R1	T5	0.31	1	0.8	0.8	9	10		T3	0.3
	R1	T6	0.34	1.3	0.8	0.3	9	9		T4	0.32
	R1	T7	0.36	1.9	0.9	0.3	11	7		T5	0.31
	R1	T8	0.37	2	1.1	0.2	12	5		T6	0.34
	R2	T1	0.4	1.1	1.1	1	9	12.4		T7	0.36
	R2	T2	0.22	1.4	1	1.1	8.5	14		T8	0.37
	R2	T3	0.4	2	1	0.55	7.6	13.5
	R2	T4	0.35	1.8	1	0.5	7.7	15.3					ET	0.010735	0.011547	0.010735	0.00732051	0.0145297	0.0057735	0.011547	0.0057735
	R2	T5	0.34	1.3	1.1	0.85	9.2	10.3
	R2	T6	0.35	1.5	0.9	0.33	9.5	10
	R2	T7	0.38	2	0.7	0.4	11.3	7.2
	R2	T8	0.38	2.4	1.5	0.22	12.5	5.1
	R3	T1	0.2	0.9	0.9	0.8	7	11.6		Treatment	CT
	R3	T2	0.18	1	0.4	0.7	7.5	12		T1	1
	R3	T3	0.2	1	0.6	0.45	6.4	12.5		T2	1.2
	R3	T4	0.29	1.4	1.4	0.3	6.3	14.7		T3	1.5
	R3	T5	0.29	0.7	0.5	0.75	8.8	9.7		T4	1.6
	R3	T6	0.33	1.1	0.7	0.27	8.5	8		T5	1
	R3	T7	0.34	1.8	1.1	0.2	10.7	6.8		T6	1.3
	R3	T8	0.36	1.6	0.7	0.18	11.5	4.9		T7	1.9
										T8	2
		Treatment	ET	CT	PT	MXCA	VBA	PiA					CT	0.0773503	0.154701	0.108675	0.154701	0.0732051	0.11547	0.0773503	0.073094
		T1	0.3	1	1	0.9	8	12
		T1	0.4	1.1	1.1	1	9	12.4
		T1	0.2	0.9	0.9	0.8	7	11.6
		average	0.3	1	1	0.9	8	12
										Treatment	PT
										T1	1
		Treatment	ET	CT	PT	MXCA	VBA	PiA		T2	0.7
		T2	0.2	1.2	0.7	0.9	8	13		T3	0.8
		T2	0.22	1.4	1	1.1	8.5	14		T4	1.2
		T2	0.18	1	0.4	0.7	7.5	12		T5	0.8
		average	0.2	1.2	0.7	0.9	8	13		T6	0.8
										T7	0.9
										T8	1.1
		Treatment	ET	CT	PT	MXCA	VBA	PiA					PT	0.0773503	0.0620508	0.0547005	0.0847005	0.0932051	0.0773503	0.0700538	0.0940108
		T3	0.3	1.5	0.8	0.5	7	13
		T3	0.4	2	1	0.55	7.6	13.5
		T3	0.2	1	0.6	0.45	6.4	12.5
		average	0.3	1.5	0.8	0.5	7	13		Treatment	MXCA
										T1	0.9
										T2	0.9
		Treatment	ET	CT	PT	MXCA	VBA	PiA		T3	0.5
		T4	0.32	1.6	1.2	0.4	7	15		T4	0.4
		T4	0.35	1.8	1	0.5	7.7	15.3		T5	0.8
		T4	0.29	1.4	1.4	0.3	6.3	14.7		T6	0.3
		average	0.32	1.6	1.2	0.4	7	15		T7	0.3
										T8	0.2
													MXCA	0.057735	0.0470054	0.0688675	0.0773503	0.0288675	0.0732051	0.067735	0.0547005
		Treatment	ET	CT	PT	MXCA	VBA	PiA
		T5	0.31	1	0.8	0.8	9	10
		T5	0.34	1.3	1.1	0.85	9.2	10.3
		T5	0.29	0.7	0.5	0.75	8.8	9.7		Treatment	VBA
		average	0.313333	1	0.8	0.8	9	10		T1	8
										T2	8
										T3	7
										T4	7
		Treatment	ET	CT	PT	MXCA	VBA	PiA		T5	9
		T6	0.34	1.3	0.8	0.3	9	9		T6	9
		T6	0.35	1.5	0.9	0.33	9.5	10		T7	11
		T6	0.33	1.1	0.7	0.27	8.5	8		T8	12
		average	0.34	1.3	0.8	0.3	9	9					VBA	0.57735	0.886751	0.464102	0.404145	0.41547	0.288675	0.473205	0.288675
		Treatment	ET	CT	PT	MXCA	VBA	PiA
		T7	0.36	1.9	0.9	0.3	11	7
		T7	0.38	2	0.7	0.4	11.3	7.2		Treatment	PiA
		T7	0.34	1.8	1.1	0.2	10.7	6.8		T1	12
		average	0.36	1.9	0.9	0.3	11	7		T2	13
										T3	13
										T4	15
		Treatment	ET	CT	PT	MXCA	VBA	PiA		T5	10
		T8	0.37	2	1.1	0.2	12	5		T6	9
		T8	0.38	2.4	1.5	0.22	12.5	5.1		T7	7
		T8	0.36	1.6	0.7	0.18	11.5	4.9		T8	5		PiA	0.23094	0.57735	0.288675	0.173205	0.173205	0.57735	0.21547	0.157735
		average	0.37	2	1.1	0.2	12	5

## Sheet: Leaf Anatomy
	Triticum		Leaf
	Replicate	Treatment	UET	LT	MXCA	AdSD	AbSD			Treatment	UET
	R1	T1	0.4	6	0.4	75	90			T1	0.4
	R1	T2	0.37	5.7	0.37	50	90			T2	0.37
	R1	T3	0.44	6.5	0.35	58	80			T3	0.44
	R1	T4	0.51	6.5	0.35	65	60			T4	0.51
	R1	T5	0.42	5.8	0.2	48	95			T5	0.42
	R1	T6	0.47	5.5	0.26	55	100			T6	0.47
	R1	T7	0.54	5.5	0.34	63	105			T7	0.54
	R1	T8	0.55	5.6	0.34	70	75			T8	0.55
	R2	T1	0.5	7	0.6	76	90.5
	R2	T2	0.3	6	0.3	50.5	91
	R2	T3	0.45	7	0.4	58.4	80.2						UET	0.037735	0.0404145	0.037735	0.031547	0.0273205	0.033094	0.027735	0.0288675
	R2	T4	0.49	6.6	0.36	65.3	60.5
	R2	T5	0.45	6	0.22	49	95.4
	R2	T6	0.51	6	0.3	55.5	101
	R2	T7	0.55	5.3	0.35	63.4	105.2
	R2	T8	0.6	5.8	0.3	71	76			Treatment	LT
	R3	T1	0.3	5	0.2	74	89.5			T1	6
	R3	T2	0.44	5.4	0.44	49.5	89			T2	5.7
	R3	T3	0.43	6	0.3	57.6	79.8			T3	6.5
	R3	T4	0.53	6.4	0.34	64.7	59.5			T4	6.5
	R3	T5	0.39	5.6	0.18	47	94.6			T5	5.8
	R3	T6	0.43	5	0.22	54.5	99			T6	5.5
	R3	T7	0.53	5.7	0.33	62.6	104.8			T7	5.5
	R3	T8	0.5	5.4	0.38	69	74			T8	5.6
		Treatment	UET	LT	MXCA	AdSD	AbSD						LT	0.223503	0.273205	0.288675	0.157735	0.21547	0.288675	0.11547	0.11547
		T1	0.4	6	0.4	75	90
		T1	0.5	7	0.6	76	90.5
		T1	0.3	5	0.2	74	89.5
		average	0.4	6	0.4	75	90
										Treatment	MXCA
										T1	0.4
		Treatment	UET	LT	MXCA	AdSD	AbSD			T2	0.37
		T2	0.37	5.7	0.37	50	90			T3	0.35
		T2	0.3	6	0.3	50.5	91			T4	0.35
		T2	0.44	5.4	0.44	49.5	89			T5	0.2
		average	0.37	5.7	0.37	50	90			T6	0.26
										T7	0.34
										T8	0.34
		Treatment	UET	LT	MXCA	AdSD	AbSD						MXCA	0.0247005	0.0204145	0.0188675	0.0157735	0.0254701	0.033094	0.0257735	0.023094
		T3	0.44	6.5	0.35	58	80
		T3	0.45	7	0.4	58.4	80.2
		T3	0.43	6	0.3	57.6	79.8
		average	0.44	6.5	0.35	58	80			Treatment	AdSD
										T1	75
										T2	50
		Treatment	UET	LT	MXCA	AdSD	AbSD			T3	58
		T4	0.51	6.5	0.35	65	60			T4	65
		T4	0.49	6.6	0.36	65.3	60.5			T5	48
		T4	0.53	6.4	0.34	64.7	59.5			T6	55
		average	0.51	6.5	0.35	65	60			T7	63
										T8	70
		Treatment	UET	LT	MXCA	AdSD	AbSD						AdSD	1.57735	2.28868	2.23094	2.17321	1.57735	2.28868	1.23094	2.57735
		T5	0.42	5.8	0.2	48	95
		T5	0.45	6	0.22	49	95.4
		T5	0.39	5.6	0.18	47	94.6			Treatment	AbSD
		average	0.42	5.8	0.2	48	95			T1	90
										T2	90
										T3	80
										T4	60
		Treatment	UET	LT	MXCA	AdSD	AbSD			T5	95
		T6	0.47	5.5	0.26	55	100			T6	100
		T6	0.51	6	0.3	55.5	101			T7	105
		T6	0.43	5	0.22	54.5	99			T8	75
		average	0.47	5.5	0.26	55	100
													AbSD	2.28868	2.57735	2.11547	2.28868	2.23094	1.57735	2.11547	3.57735
		T7	0.54	5.5	0.34	63	105
		T7	0.55	5.3	0.35	63.4	105.2
		T7	0.53	5.7	0.33	62.6	104.8
		average	0.54	5.5	0.34	63	105
		Treatment	UET	LT	MXCA	AdSD	AbSD
		T8	0.55	5.6	0.34	70	75
		T8	0.6	5.8	0.3	71	76
		T8	0.5	5.4	0.38	69	74
		average	0.55	5.6	0.34	70	75
